# Supplementary material
Source: Springer Nature journal article supplement (https://www.springermedizin.de/resource/supplementary/12876_2009_400_MOESM1_ESM.pdf/9437104)

# Changes of PGE<sub>2</sub> metabolism and signaling efficiency in CRC

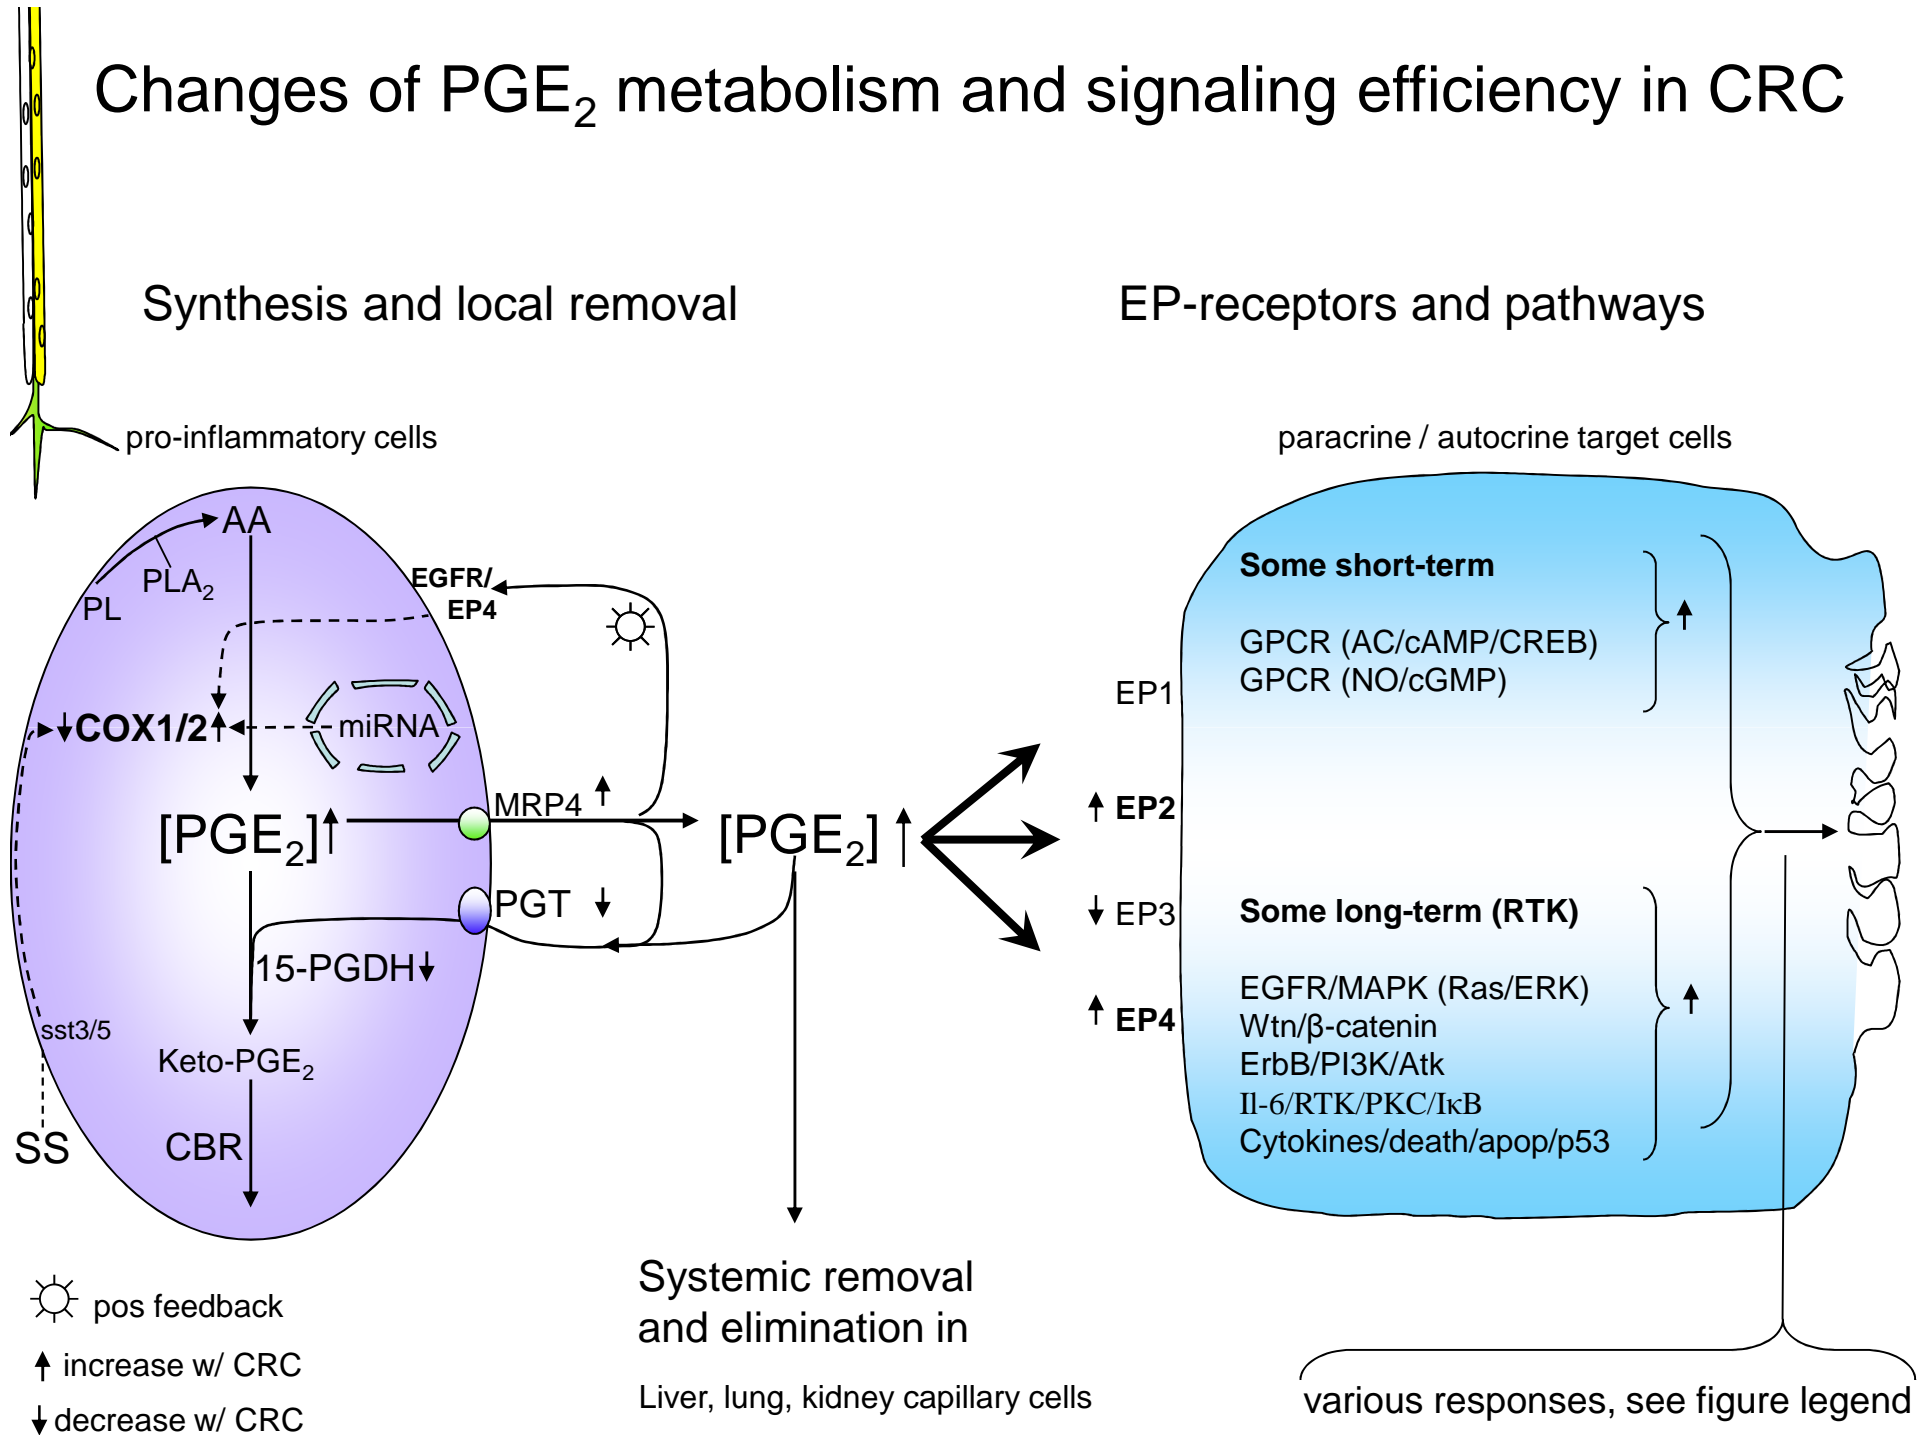

Supplement: MOESM1 [file 9437104]
